# Supplementary material for: Well-defined polymorph transformation sequences and novel tetragonal twin-domain patterns in the morphotropic phase boundary of Dy-modified BiFeO3–PbTiO3 single crystals
Source: Royal Society of Chemistry journal article supplement (doi:10.1039/d4tc00630e), 2024-01-01
Supplement: d4tc00630e1.pdf [file d4tc00630e1.pdf]

# Supplemental Materials

## Well-defined polymorph transformation sequence and novel tetragonal twin-domain patterns in the morphotropic phase boundary of Dy-modified $\text{BiFeO}_3\text{-PbTiO}_3$ single crystal

Yanzi Xiang<sup>1</sup>, Jian Zhuang<sup>1\*</sup>, Zhuohua Tang<sup>1</sup>, Zheyi An<sup>1</sup>, Zhang Yi<sup>1</sup>, Guobao Feng<sup>2</sup>,

Stas P. Kubrin<sup>3</sup>, Wei Ren<sup>1</sup>, and Nan Zhang<sup>1\*</sup>

<sup>1</sup>Electronic Materials Research Laboratory, Key Laboratory of the Ministry of Education & International Centre for Dielectric Research, School of Electronic Science and Engineering, Xi'an Jiaotong University, Xi'an, 710049, China

<sup>2</sup>National Key Laboratory of Science and Technology on Space Microwave, China Academy of Space Technology, Xi'an 710100, China.

<sup>3</sup>Research Institute of Physics, Southern Federal University Rostov-On-Don 344090, Russia.

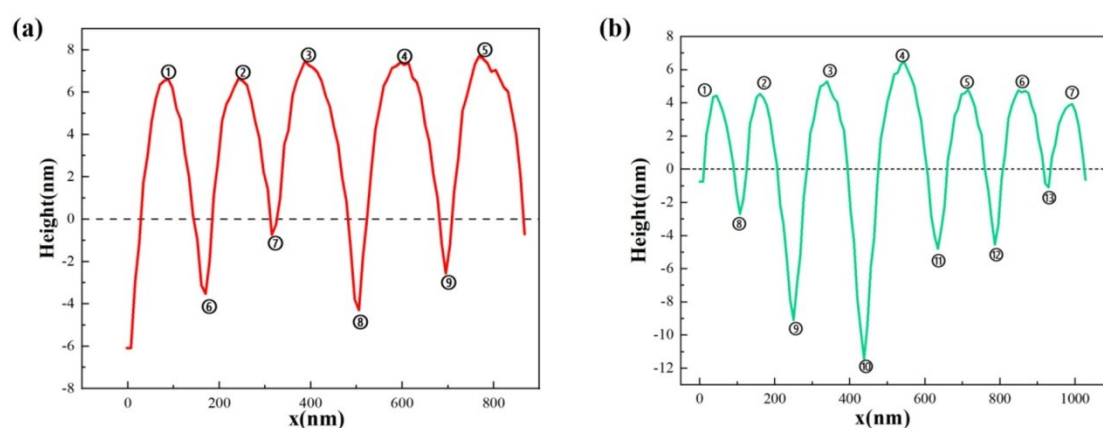

FIG. S1. the Cross-sectional profiles of morphology along the selected dashed lines with an arrow

“1” (a) and an arrow “2” (b) in Figure 5a.

Supplement TABLE S1. The calculated values of  $\theta_1/\theta_2$  for line 1

| No.                     | 1     | 2    | 3     | 4    | 5    | Mean  |
|-------------------------|-------|------|-------|------|------|-------|
| Angle $\theta_1/^\circ$ | 5.78  | 4.92 | 3.30  | 3.92 | 3.41 | 4.27  |
| No.                     | 6     | 7    | 8     | 9    |      | Mean  |
| Angle $\theta_2/^\circ$ | 12.05 | 9.19 | 14.53 | 9.60 |      | 11.34 |

Supplement TABLE S2. The calculated values of  $\theta_1/\theta_2$  for line 2

| No.                     | 1     | 2     | 3     | 4    | 5    | 6     | 7    | Mean  |
|-------------------------|-------|-------|-------|------|------|-------|------|-------|
| Angle $\theta_1/^\circ$ | 6.69  | 4.03  | 4.99  | 3.78 | 2.59 | 6.08  | 3.58 | 4.53  |
| No.                     | 8     | 9     | 10    | 11   | 12   | 13    |      | Mean  |
| Angle $\theta_2/^\circ$ | 10.40 | 13.35 | 14.69 | 7.51 | 8.67 | 11.52 |      | 11.02 |
